# Supplementary material for: Water dynamics visited. A comprehensive DFT study of proton transfer in liquid water underscores the pivotal role of ion pairing phenomena
Source: Research Square preprint supplement (doi:10.21203/rs.3.rs-8425076/v1), 2026-02-04
Supplement: Supplementary file 1 [file e26a225ae6ce5263b28cb2ab.docx]

Supplementary information list (link for downloading specific folders described below): https://doi.org/10.5281/zenodo.18016723

Herein we provide Supplementary Information to our main text, distributed in four large blocks (folders), as follows:

1.-The **Direct Proton Transfer** (DPT) folder contains one hundred and fifty (150) subfolders, each one of them corresponding to every water cluster found to undergo a DPT process. Subfolders are identified, in the case of neutral water clusters, by a label of the type

whereas for neutral, ionized water clusters they are identified by a label of the type

These subfolders provide the readers with the Cartesian coordinates of the following stationary points [m062x/6-311++(d,p), PCM= water]: the transition state for the DPT process, and the products PT1 and PT2 resulting from the DPT process. When appropriate (actually, at neutral water clusters: 8W3, 8W12, 10W11, 10W14, 11W6, 11W8, 11W10, 11W13, 13W8, 14W2, 16W7, 16W21, 16W22, 18W10, 18W11, 18W13, 19W1, 19W5, 20W1, 20W2, 20W9, 20W11, 20W12, 20W15, 20W16, 20W17, 21W1, 21W12, 21W14, 21W15, 22W2, 25W1, 28W1, 30W1, 30W1-1, 30W1-3, as well as at neutral, ionized water clusters: 20W20-IP1607, 30W2-IP5807) the readers could also find the corresponding AIM analysis as a .docx document.

2.- The **DPT_PES** folder contains one hundred and fifty (150) documents (with the above labels with the extra notation _PES) describing the details of the PES (the Potential Energy Surface) such as the energy and frequency values of three stationary points [m062x/6-311++(d,p), PCM= water] of DPT processes, namely: the transition state, and the products PT1 and PT2 resulting from such DPT process, together with the “wiring” observed at the transition state (a very short-lived ion-pair).

3.- Since indirect proton transfer processes involve ion-pairs (IP), we have designated them as **Ion-Pair Proton Transfer (IPPT)** processes. The IPPT folder contains one hundred and nine (109) subfolders, each one of them corresponding to every water cluster found to undergo ion-pair proton transfer processes of any kind: **Ion-Pair Collapse (IPC)** and **Ion-Pair-Walk (IPW)**. The IPPT subfolders also include proton transfer processes undergone by single ion-pair water clusters, namely: **Ion-Pair Collapse (IPC)**, **Ion-Pair Crossed-Collapse (IPCC)**, **Ion-Pair Quench (IPQ)** and **Ion-Pair-Walk (IPW)** proton transfer processes. In addition, two IPPT subfolders are dedicated to illustrate specific properties of ion-pairs, namely **Ion-Pair Inversion (IPI)** processes and **Ion-Pair Isomerization**. The proton transfer capacities of the concave and convex products of inversion processes 17W3-IP4640 and 18W16-IP0605 have been examined to learn on the integrity of their ion-pair systems.

Subfolders involving single ion-pairs are identified by a label of the type

and subfolders involving bis ion-pairs are identified by a label of the type

These labels apply to individual, uncorrelated examples. For correlated cases we still employ the above labels, though with an extra single digit (1, 2, 3, etc) after the first dash.

On the other hand, subfolders assigned to describe Ion-Pair Inversion (IPI) and Ion-Pair Isomerization processes are identified by labels of the type:

All the above mentioned subfolders provide the readers with the Cartesian coordinates of three stationary points [m062x/6-311++(d,p), PCM: water]: the starting ion-pair cluster, the transition state for the every kind of the above-mentioned proton transfer processes, and the final ion-pair cluster.

Special attention has been taken to demonstrate the capacity of an ion-pair to walk in a maximum of nx6 spatial directions (six directions for single ion-pairs, 12 for bis ion-pairs, etc), as well as to probe the capacity of long-living ion-pairs to “drive” across the hydrogen bond network. These two issues are described in the correlated series of 17W5 (five members), 17W7 (five members), 18W2 (four members), 20W4 (eight members), 20W19 (six members), 20W22 (five members) and 21W15 (five members).

Whenever appropriate the readers could find also the AIM analysis as .docx documents. In particular, at IPC [20W5-IP2225, 21W1-IP5234, 21W9-IP1316, 26W1-IP4922 and 29W1-IP5522] processes, at IPW(standart) [21W15-IP0755, 22W1-IP4937, 24W1-IP6404, 30W2-IP5871], IPW(walk) [20W19-IP2243, 20W19-IP2231, 20W19-IP2216, 20W19-IP2201, 20W19-IP5501] processes, at IPW(six legs) [20W4-3-IP4907]. AIM analysis is also provided for processes undergone by bis ion-pairs: IPCC [21W15-IP0704-IP1358, 21W15-IP0704-IP1346] processes, for IPC [21W15-IP0704-IP1346 (two cases) processes], for IPQ [20W20-IP3140-IP1607] processes, and for IPW [21W15-0704-IP1346] processes. AIM analysis of Ion-Pair Inversion (IPI) is also provided at subfolders: 17W7-3, 18W2-3, 18W16-1, 20W4-5 and 20W22-5.

4.- The **IPPT_PES** folder contains one hundred and fifteen (111) documents describing the details [energy and frequency values of stationary points [m062x/6-311++(d,p), PCM: water] of the transition state for the specific IPPT process, and the products PT1 and PT2 resulting from such IPPT process. A direct comparison of the “wiring” lengths observed at the ion-pair cluster and the corresponding transition state serves to recognize the compression undergone by the active wire as well as the decompression undergone by the inactive wires of the system.
